# Supplementary material for: Direct arylation catalysis with chloro[8-(dimesitylboryl)quinoline-κN]copper(I)
Source: publisher site journal article supplement (doi:10.3762/bjoc.12.272), 2016-12-15
Supplement: Additional file 1 [file 1860-5397-12-272-S1.pdf]

# Supporting Information

for

## Direct arylation catalysis with chloro[8-(dimesitylboryl)quinoline- $\kappa$ N]copper(I)

Sem Raj Tamang and James D. Hoefelmeyer\*

Address: Department of Chemistry, University of South Dakota, 414 E. Clark St.,  
Vermillion, SD 57069, USA

Email: James D. Hoefelmeyer - jhoefelm@usd.edu

\* Corresponding author

### NMR spectra and GC–MS data of the products

#### Contents:

|                                                                                                         |     |
|---------------------------------------------------------------------------------------------------------|-----|
| <b>Figure S1:</b> $^1\text{H}$ NMR of biphenyl. ....                                                    | S3  |
| <b>Figure S2:</b> $^1\text{H}$ NMR of 4-methoxybiphenyl. ....                                           | S4  |
| <b>Figure S3:</b> $^1\text{H}$ NMR of 4-methylbiphenyl. ....                                            | S5  |
| <b>Figure S4:</b> GC–MS data of biphenyl. $m/z = 154$ . ....                                            | S6  |
| <b>Figure S5:</b> GC–MS data of direct arylation at 1 and 2 position of naphthalene. $m/z = 204$ . .... | S7  |
| <b>Figure S6:</b> GC–MS data for <i>p</i> -methoxybiphenyl. $m/z = 234$ . ....                          | S8  |
| <b>Figure S7:</b> GC–MS data for <i>m</i> -chlorobiphenyl. $m/z = 188$ . ....                           | S9  |
| <b>Figure S8:</b> GC–MS data for <i>p</i> -nitrobiphenyl. $m/z = 199$ . ....                            | S10 |
| <b>Figure S9:</b> GC–MS data for <i>m</i> -methylbiphenyl. $m/z = 168$ . ....                           | S11 |

## Experimental

### General Conditions

Compound 1 and Chloro[8-(dimesitylboryl)quinoline- $\kappa$ N]copper(I) was prepared according to the literature [1]. All organic reagents and solvents were obtained from commercial sources and used without further purification. A GCMS-QP2010SE gas chromatograph-mass spectrometer (Shimadzu Corp., Kyoto, Japan) was used for GCMS analyses. NMR spectra were recorded on an Avance 400 MHz spectrometer (Bruker, Billerica, MA, USA).

### Experimental Conditions

A 50 mL roundbottom flask was charged with 0.5 mmol of aryl halide, benzene (4mL) and 1.5 mmol of KO $t$ Bu. The flask was fitted with a reflux condenser left open to air. Then, a solution of catalyst dissolved in 420 $\mu$ L DMF was added to the reaction. The reaction was then stirred and refluxed for 40 hrs. The reaction was worked up by extraction with ether and washing with DI H<sub>2</sub>O. The organic phase was collected and dried over anhydrous sodium sulfate. The residue was purified by flash column chromatography. NMR spectra of isolated products matched well with the literature.

[1] Son, J.H.; Pudenz, M.A.; Hoefelmeyer, J.D. *Dalton Trans.* **2010**, 39, 11081-11090.

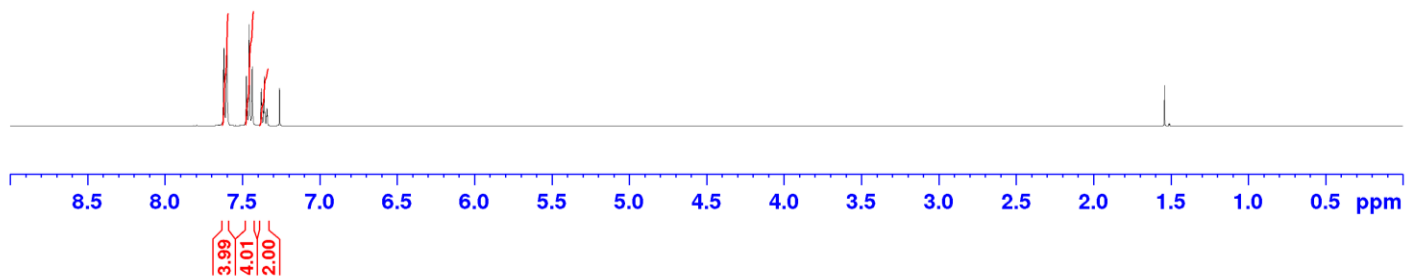

**Figure S1:**  $^1\text{H}$  NMR of biphenyl in  $\text{CDCl}_3$ .

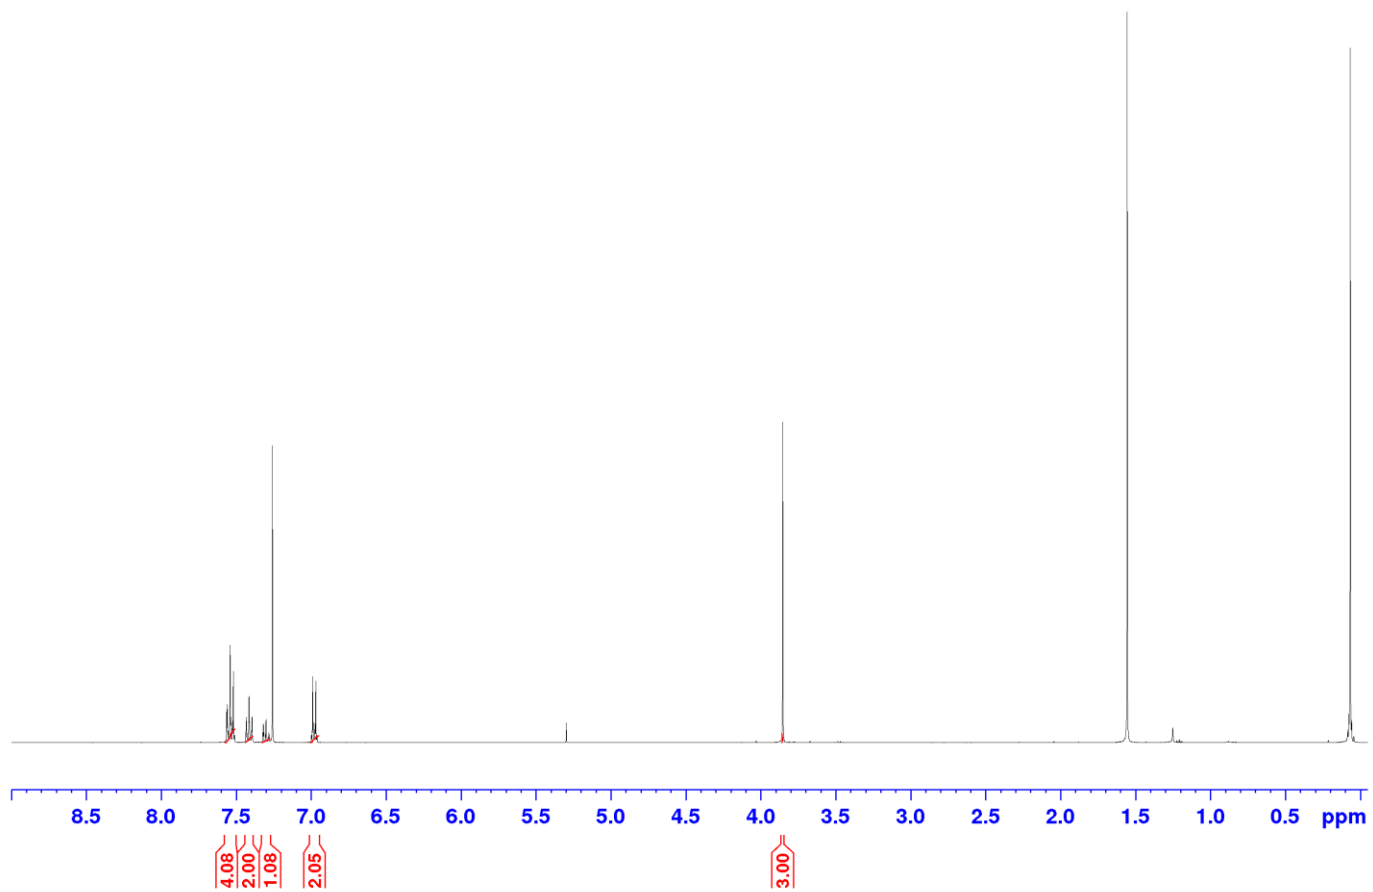

**Figure S2:**  $^1\text{H}$  NMR of 4-methoxybiphenyl in  $\text{CDCl}_3$ .

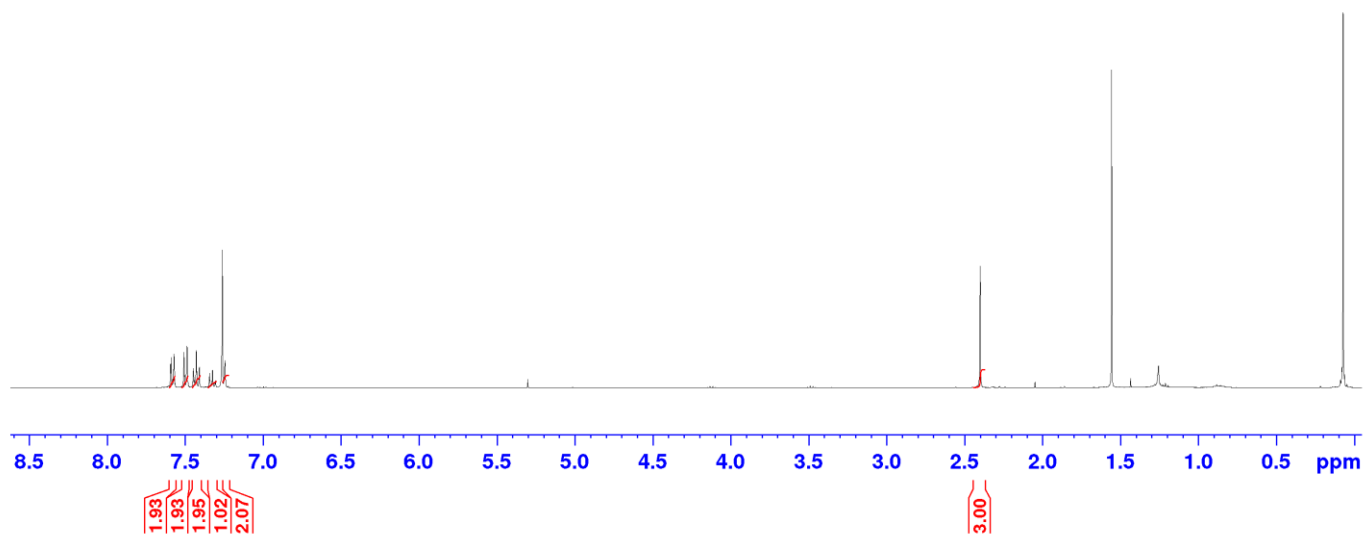

**Figure S3:**  $^1\text{H}$  NMR of 4-methylbiphenyl in  $\text{CDCl}_3$ .

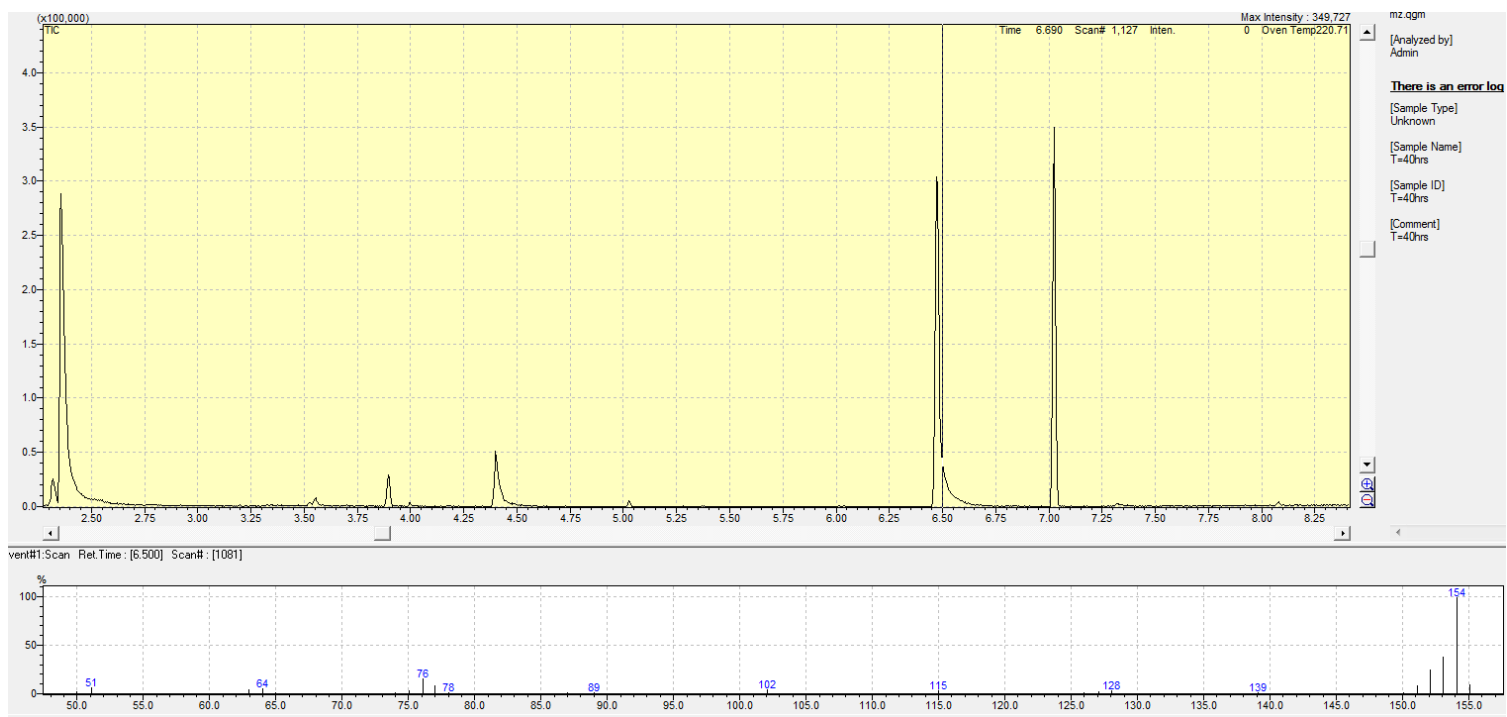

**Figure S4:** GC-MS data of biphenyl.  $m/z = 154$ .

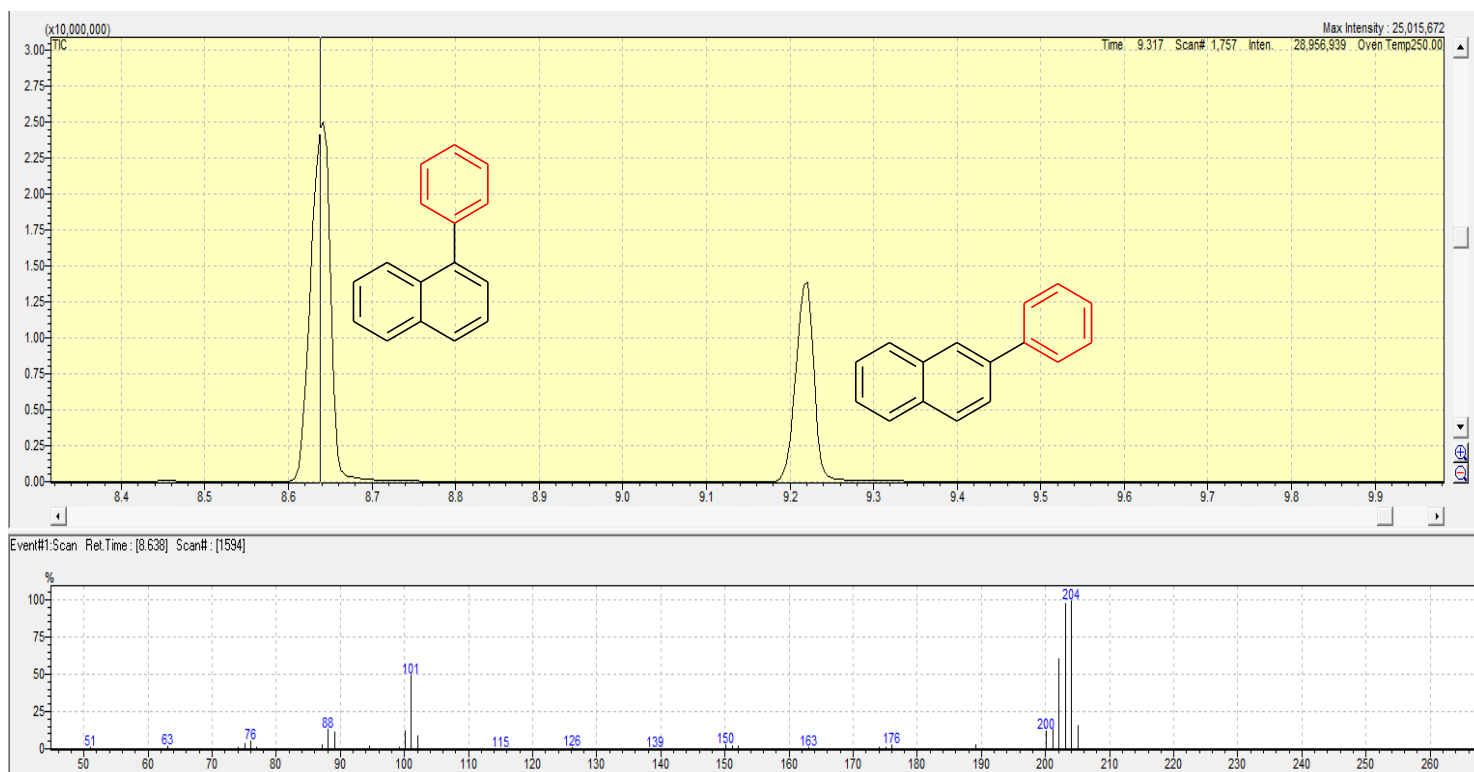

**Figure S5:** GC–MS data of direct arylation at 1 and 2 position of naphthalene.  $m/z = 204$ .

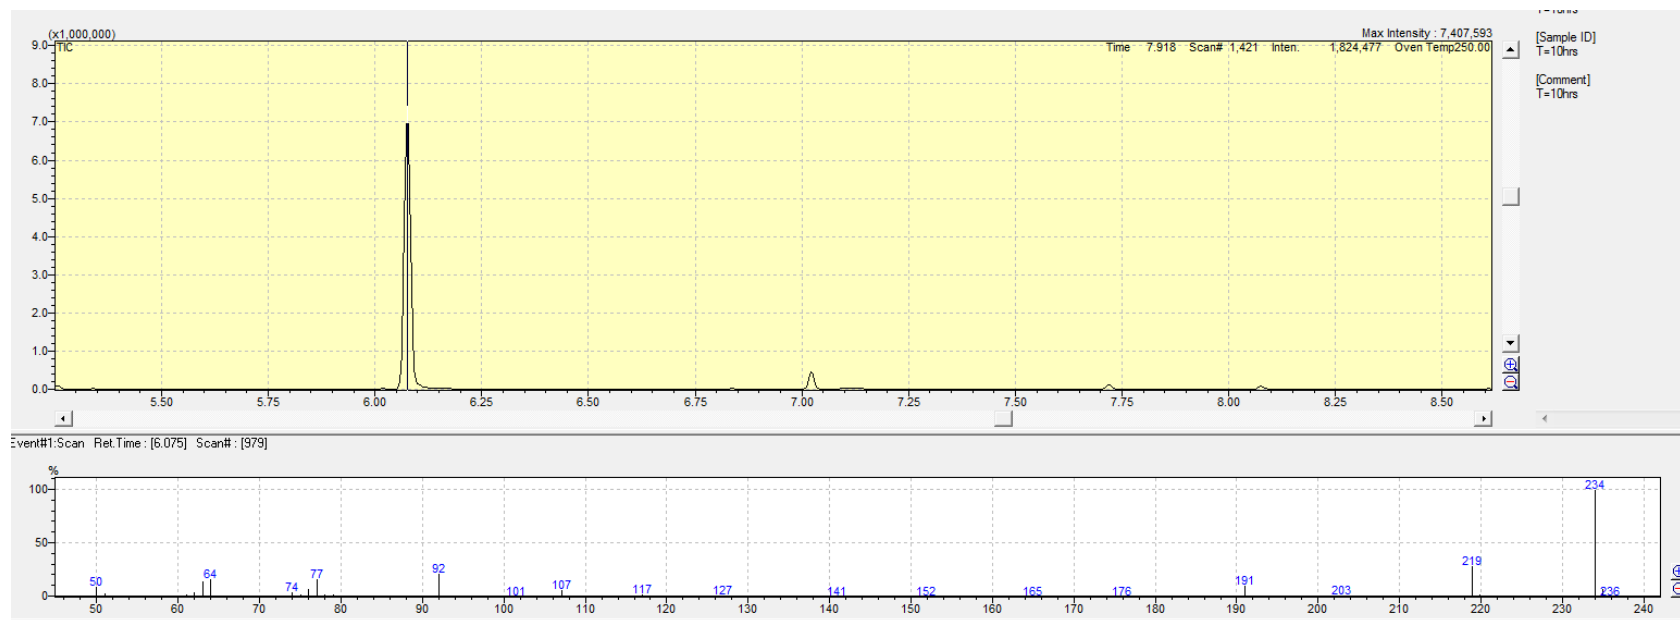

**Figure S6:** GC–MS data for *p*-methoxybiphenyl.  $m/z = 234$ .



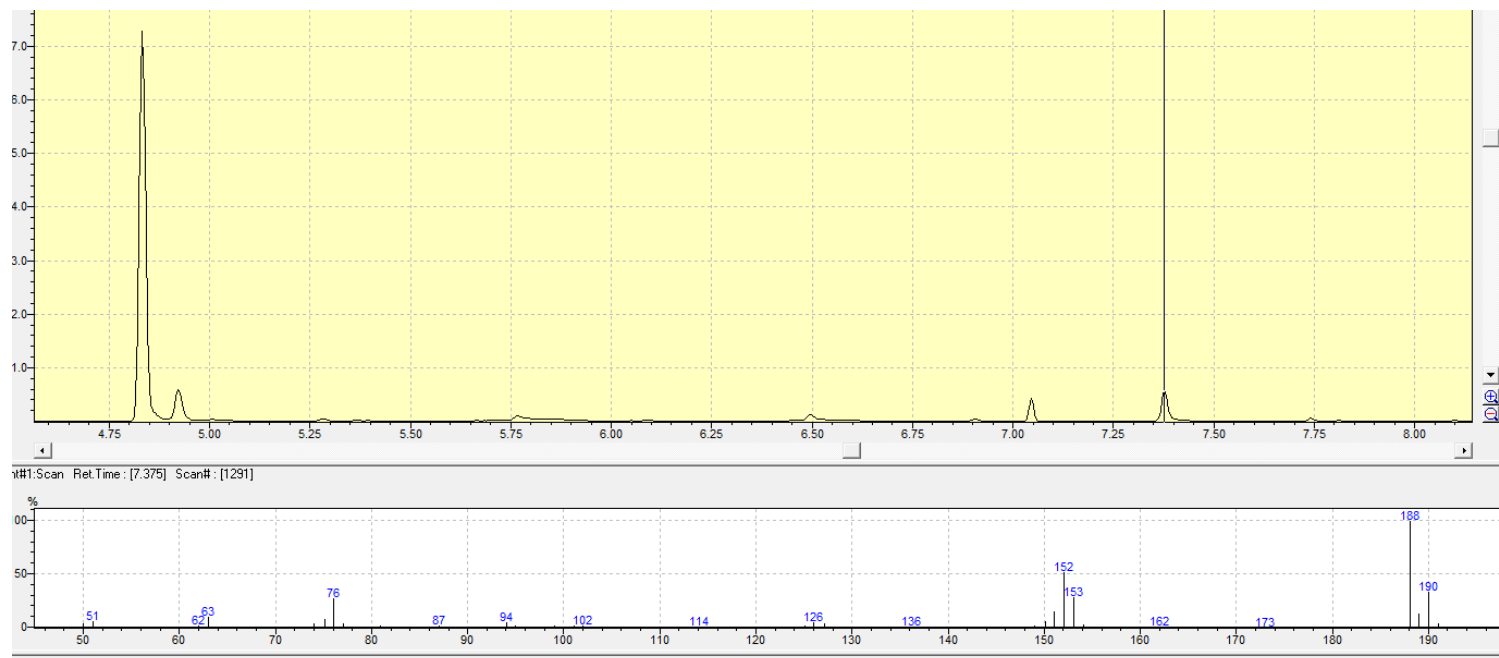

**Figure S7:** GC–MS data for *m*-chlorobiphenyl. *m/z* = 188.

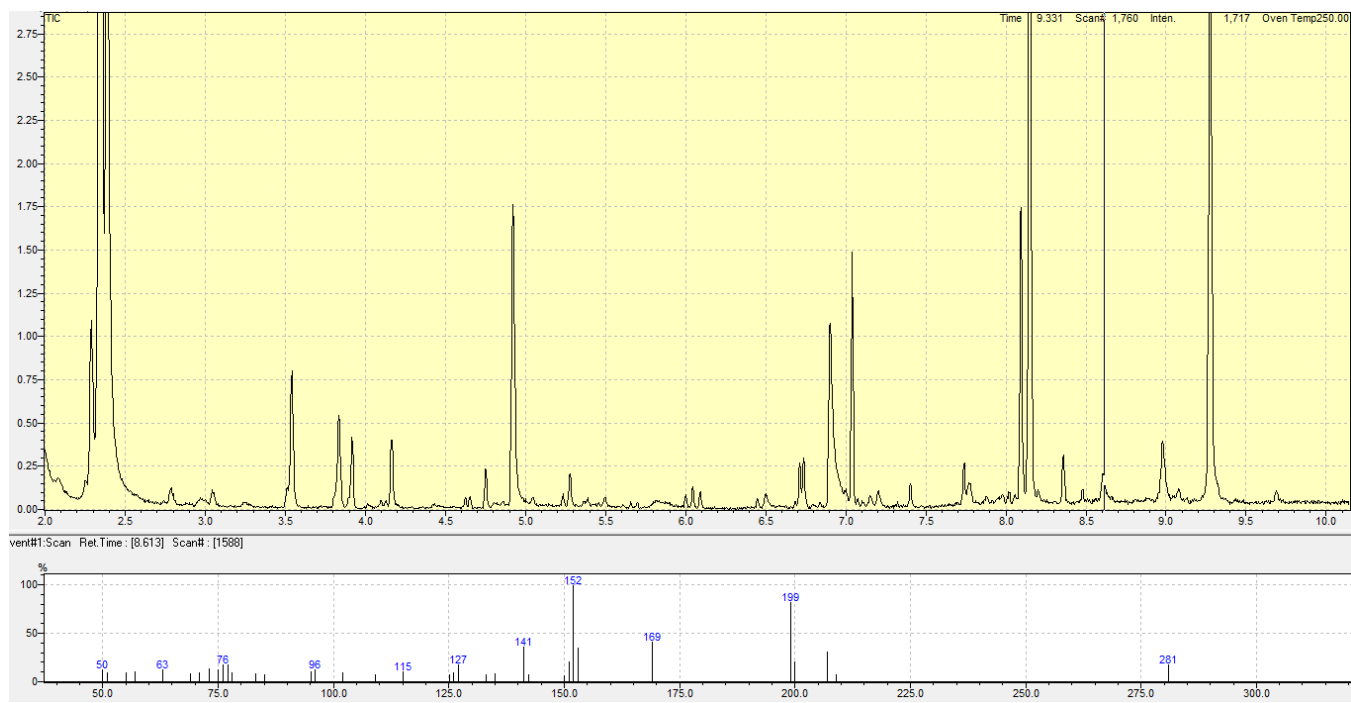

**Figure S8:** GC-MS data for *p*-nitrobiphenyl.  $m/z = 199$ .

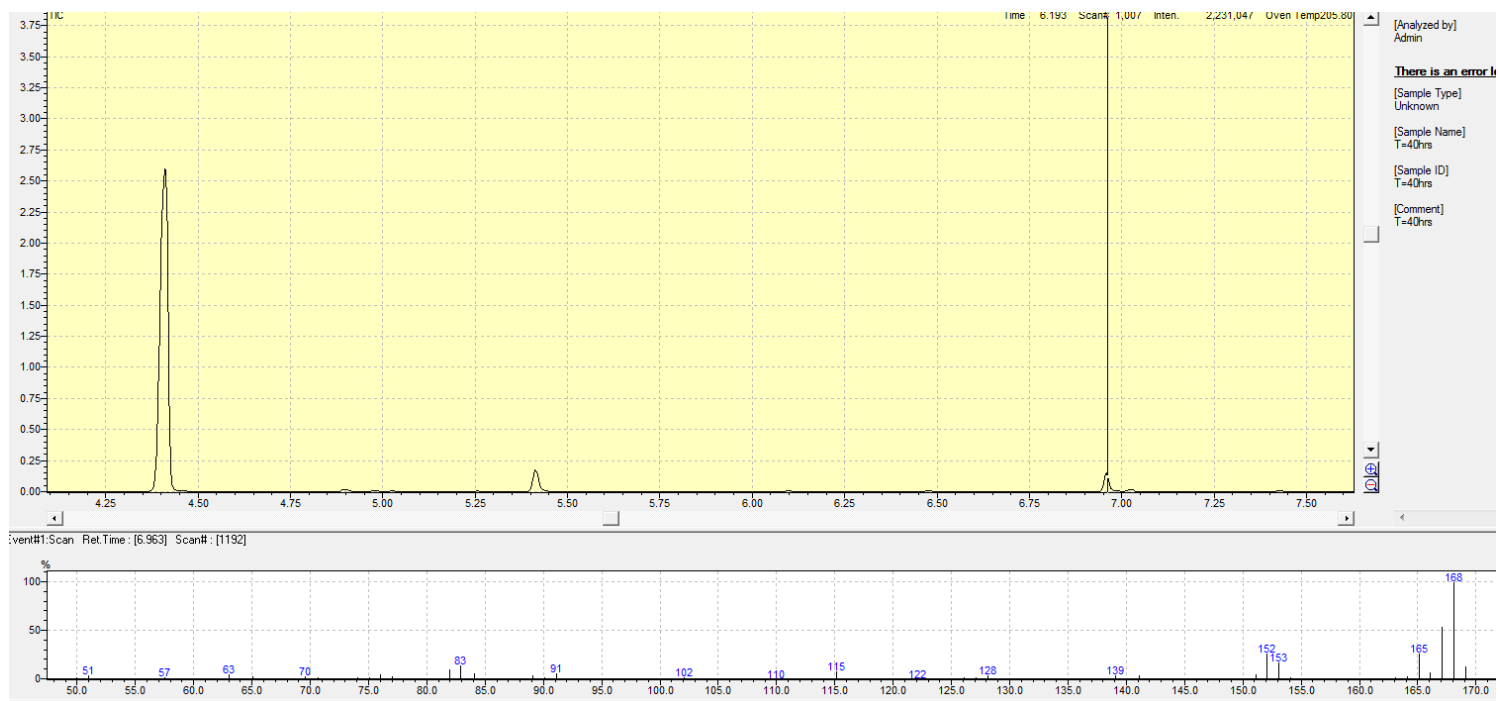

**Figure S9:** GC-MS data for *m*-methylbiphenyl.  $m/z = 168$ .
